# Supplementary material for: Genomic evaluation of the probiotic and pathogenic features of Enterococcus faecalis from human breast milk and comparison with the isolates from animal milk and clinical specimens
Source: PeerJ. 2024 Oct 29;12:e18392. doi: 10.7717/peerj.18392 (PMC11529597; doi:10.7717/peerj.18392)
Supplement: Table S1 [file peerj-12-18392-s001.xlsx]

## Sheet: Table S1
Table 1. Description of the Enterococcus faecalis genomes analyzed in this study.
Strains ID	Isolation Source	Host	Country	Genome Source	Accession No*
Efa_HMD9_11M	Milk	Human	Saudi Araiba	This Study	SRR27392744
Efa_HMD11_46M	Milk	Human	Saudi Araiba	This Study	SRR27392743
Efa_HMD12_49M	Milk	Human	Saudi Araiba	This Study	SRR27392742
APC 3825	Milk	Human	Ireland	Database	GCF_009897865.1
FYM7_1	Milk	Human	China	Database	GCF_023699395.1
FYM7_2	Milk	Human	China	Database	GCF_023699385.1
FYM7_3	Milk	Human	China	Database	GCF_023699355.1
FYM9_5	Milk	Human	China	Database	GCF_023699345.1
FYM14_1	Milk	Human	China	Database	GCF_023699495.1
CAUM157	Milk	Cattle	South Korea	Database	GCF_014805465.1
BR-MHR268	Milk	Cattle	Bangladesh	Database	GCF_022631255.1
FC	Milk	Cattle	China	Database	GCF_005158025.1
LJM:05	Milk	Cattle	India	Database	GCA_033190115
QH5_5	Milk	Yalk	China	Database	GCF_023698555.1
W35	Milk	Sheep	Greece	Database	GCF_029350545.1
DRD-78	Milk	Sheep	Greece	Database	GCF_023743395.1
Efs76	Blood	Human	Saudi Araiba	Database	OVUZ01000000
Efs122	Blood	Human	Saudi Araiba	Database	OVVI01000000
Efs187	Blood	Human	Saudi Araiba	Database	OVVW01000000
Efs14	Tissue swab	Human	Saudi Araiba	Database	OVUR01000000
Efs16	Tissue swab	Human	Saudi Araiba	Database	OVUQ01000000
Efs133	Tissue swab	Human	Saudi Araiba	Database	OVVM01000000
Efs165	Tissue swab	Human	Saudi Araiba	Database	OVVL01000000
Efs196	Tracheal aspirate	Human	Saudi Araiba	Database	OVVX01000000
Efs7	Urethral swab	Human	Saudi Araiba	Database	OVUX01000000
Efs24	Urine catheter	Human	Saudi Araiba	Database	OVUT01000000
Efs30	Urine catheter	Human	Saudi Araiba	Database	OVUS01000000
Efs41	Urine catheter	Human	Saudi Araiba	Database	OVUP01000000
Efs88	Urine catheter	Human	Saudi Araiba	Database	OVVA01000000
Efs93	Urine catheter	Human	Saudi Araiba	Database	OVVC01000000
Efs107	Urine catheter	Human	Saudi Araiba	Database	OVVB01000000
Efs136	Urine catheter	Human	Saudi Araiba	Database	OVVF01000000
Efs144	Urine catheter	Human	Saudi Araiba	Database	OVVG01000000
Efs153	Urine catheter	Human	Saudi Araiba	Database	OVUV01000000
Efs175	Urine catheter	Human	Saudi Araiba	Database	OVVV01000000
Efs183	Urine catheter	Human	Saudi Araiba	Database	OVVZ01000000
Efs6	Urine midstream	Human	Saudi Araiba	Database	OVUU01000000
Efs44	Urine midstream	Human	Saudi Araiba	Database	OVUY01000000
Efs62	Urine midstream	Human	Saudi Araiba	Database	OVUW01000000
Efs110	Urine midstream	Human	Saudi Araiba	Database	OVVD01000000
Efs128	Urine midstream	Human	Saudi Araiba	Database	OVVE01000000
Efs142	Urine midstream	Human	Saudi Araiba	Database	OVVK01000000
Efs145	Urine midstream	Human	Saudi Araiba	Database	OVVH01000000
Efs154	Urine midstream	Human	Saudi Araiba	Database	OVVO01000000
Efs163	Urine midstream	Human	Saudi Araiba	Database	OVVN01000000
Efs171	Urine midstream	Human	Saudi Araiba	Database	OVVQ01000000
Efs173	Urine midstream	Human	Saudi Araiba	Database	OVVR01000000
Efs178	Urine midstream	Human	Saudi Araiba	Database	OVVT01000000
Efs185	Urine midstream	Human	Saudi Araiba	Database	OVWE01000000
Efs189	Urine midstream	Human	Saudi Araiba	Database	OVVY01000000
Efs208	Urine midstream	Human	Saudi Araiba	Database	OVWC01000000
Efs210	Urine midstream	Human	Saudi Araiba	Database	OVWB01000000
Efs212	Urine midstream	Human	Saudi Araiba	Database	OVWA01000000
Efs215	Urine midstream	Human	Saudi Araiba	Database	OVWF01000000
Efs216	Urine midstream	Human	Saudi Araiba	Database	OVWG01000000
Efs149	Wound swab	Human	Saudi Araiba	Database	OVVJ01000000
Efs166	Wound swab	Human	Saudi Araiba	Database	OVVS01000000
Efs180	Wound swab	Human	Saudi Araiba	Database	OVVU01000000
Efs197	Wound swab	Human	Saudi Araiba	Database	OVWD01000000
Symbioflor 1				Database	GCF_000317915.1
V583				Database	GCA_022406515.1
*The genomes assembly sequence was either obtained from NCBI Microbial Genomes or European Nucleotide Archive.
