# Supplementary material for: Genomic evaluation of the probiotic and pathogenic features of Enterococcus faecalis from human breast milk and comparison with the isolates from animal milk and clinical specimens
Source: PeerJ. 2024 Oct 29;12:e18392. doi: 10.7717/peerj.18392 (PMC11529597; doi:10.7717/peerj.18392)
Supplement: Table S2 [file peerj-12-18392-s002.xlsx]

## Sheet: Table S2
Table S2. Antimicrobial susceptibility and minimum inhibitory concentration of Enterococcus faecalis isolates recovered from human breast milk of Saudi population.
Antibiotics	Efa_HMD9_11M		Efa_HMD11_46M		Efa_HMD12_49M
	MIC	Interpretation	MIC	Interpretation	MIC	Interpretation
Levofloxacin	1	S	0.25	S	0.25	S
Erythromycin	>=8	R	>=8	R	>=8	R
Linezolid	2	S	2	S	2	S
Teicoplanin	<=0.5	S	<=0.5	S	<=0.5	S
Vancomycin	1	S	1	S	1	S
Tetracycline	>=16	R	>=16	R	>=16	R
Tigecycline	<=0.12	S	<=0.12	S	<=0.12	S
Nitrofurantoin	<=16	S	<=16	S	<=16	S
