# Supplementary material for: Genomic evaluation of the probiotic and pathogenic features of Enterococcus faecalis from human breast milk and comparison with the isolates from animal milk and clinical specimens
Source: PeerJ. 2024 Oct 29;12:e18392. doi: 10.7717/peerj.18392 (PMC11529597; doi:10.7717/peerj.18392)
Supplement: Table S3 [file peerj-12-18392-s003.xlsx]

## Sheet: Table S3
Table S3. Genomic annotation of the Enterococcus faecalis isolates.
Strains ID	Contigs	Genome length	GC content	Contig L50	Contig N50	Coarse consistency	Fine consistency	CheckM Completeness	CheckM contamination	Genome quality	CDS	tRNA	rRNA	Crispr_repeat	Crispr_spacer	Crispr_array	Hypothetical proteins	PFA	PECNA	PGOA	PPA	PSA	Plfam	Pgfam
Efa_HMD9_11M	58	3034311	37.2526	4	242499	99.8	98.8	100	0.5	Good	3024	53	5				667	2357	699	571	472	845	2946	2981
Efa_HMD11_46M	49	3107201	37.2217	3	414224	99.9	99	100		Good	3121	56	6	4	3	1	720	2401	703	574	473	851	3048	3079
Efa_HMD12_49M	56	3065025	37.2488	3	434729	99.9	99	100		Good	3060	54	6				685	2375	701	573	473	851	2996	3020
APC 3825	40	3026314	37.256	5	196059	99.9	98.9	100	0.4	Good	2996	53	6				655	2341	700	572	475	849	2938	2958
FYM7_1	39	2839982	37.5182	5	201505	99.6	98.4	100	0.1	Good	2812	57	4	10	9	1	538	2274	697	568	471	830	2752	2784
FYM7_2	41	2840243	37.5161	4	204115	99.6	98.4	100	0.1	Good	2811	57	4	10	9	1	537	2274	698	569	471	830	2751	2785
FYM7_3	69	2846517	37.5278	4	204295	99.6	98.4	100	0.1	Good	2830	59	4	10	9	1	539	2291	696	567	470	829	2764	2803
FYM9_5	43	2841148	37.5215	4	204167	99.6	98.4	100	0.1	Good	2817	57	4	10	9	1	542	2275	697	568	471	830	2756	2789
FYM14_1	65	2846365	37.526	5	201533	99.6	98.4	100	0.2	Good	2824	59	4	10	9	1	535	2289	698	569	471	830	2763	2800
CAUM157	2	2972812	37.4449	1	2913602	100	98.5	100	1.7	Good	2908	61	12	19	17	2	603	2305	699	571	469	856	2845	2872
BR-MHR268	17	2810324	37.4383	3	305353	99.8	98.6	100	0.2	Good	2655	47	3	13	12	1	515	2140	665	542	447	807	2602	2625
FC	6	3183730	37.2026	1	2934454	99.5	97.5	100	2.7	Good	3194	63	12				720	2474	740	610	484	869	3110	3135
LJM:05	40	2871625	37.417	3	303091	99.9	99	100		Good	2796	38	3				574	2222	682	557	463	825	2730	2761
QH5_5	94	2927573	37.5403	5	152310	99.7	98.7	100	0.1	Good	2945	59	4	10	9	1	616	2329	690	564	466	818	2854	2913
W35	77	3005618	37.3796	5	174678	99.6	98.7	100	0.4	Good	2999	73	8	11	9	2	673	2326	685	559	459	822	2911	2951
DRD-78	18	2962804	37.4645	1	2427769	99.3	98.2	100	0.2	Good	2919	52	3	7	6	1	645	2274	680	559	460	810	2834	2880
Efs6	90	2840001	37.5588	6	160954	99.8	98.7	100		Good	2824	54	6				578	2246	694	572	463	839	2727	2772
Efs7	39	2707973	37.658	3	371048	99.5	98.2	100		Good	2580	53	6	12	11	1	467	2113	667	544	451	796	2519	2549
Efs14	81	2805387	37.5908	11	83339	99.9	98.5	100	0.5	Good	2756	55	6				536	2220	686	561	460	834	2685	2727
Efs16	97	2983701	37.428	5	179023	99.7	98.9	100	0.9	Good	2952	53	6				600	2352	715	585	478	850	2860	2909
Efs24	42	2948166	37.4289	2	387538	99.7	98.8	99.9	0.4	Good	2842	55	6	12	11	1	588	2254	692	563	461	813	2783	2805
Efs30	52	3030838	37.3323	6	167097	99.9	99	100	0.2	Good	2970	46	6	8	7	1	642	2328	701	572	473	836	2877	2930
Efs41	48	2901531	37.4529	3	289157	99.9	98.9	100	0.1	Good	2859	54	6				598	2261	682	557	466	824	2773	2816
Efs44	45	2888084	37.3658	4	251600	99.9	99	100		Good	2761	55	6	20	18	2	514	2247	692	570	461	841	2713	2735
Efs53	83	3199834	37.2601	7	163480	99.9	99.1	100	0.1	Good	3250	58	6				808	2442	726	595	481	869	3156	3192
Efs62	68	3003557	37.3188	5	167857	99.9	98.8	100		Good	2971	55	6				625	2346	708	580	474	851	2901	2928
Efs76	88	3098032	37.2681	4	242516	99.9	98.9	100		Good	3113	56	6				719	2394	711	581	474	852	3032	3059
Efs88	94	2874727	37.4485	7	107191	99.9	98.8	100	0.2	Good	2829	51	6				572	2257	690	566	462	839	2741	2779
Efs93	106	2835266	37.619	7	158997	99.4	98	100	0.5	Good	2822	54	6	7	6	1	565	2257	699	576	473	844	2730	2776
Efs107	57	3004280	37.2932	4	290842	99.9	99	100	0.1	Good	2969	54	6				625	2344	707	579	474	854	2906	2932
Efs110	36	2927925	37.3379	3	372991	99.9	99	100	0.1	Good	2823	56	6	20	18	2	543	2280	696	572	463	839	2768	2793
Efs122	41	3010812	37.268	4	319995	99.9	98.9	100	0.4	Good	2975	54	6	4	3	1	648	2327	696	568	472	845	2910	2935
Efs128	50	3000807	37.2776	3	309232	99.9	98.8	100	0.2	Good	2919	56	6	18	16	2	614	2305	697	573	465	847	2854	2883
Efs133	166	2947321	37.4118	15	65833	99.9	99.3	100	0.6	Good	2954	53	6	12	11	1	597	2357	707	578	475	849	2835	2901
Efs136	55	3019518	37.28	4	243647	99.7	98.7	100	0.4	Good	2999	54	6				663	2336	699	571	473	846	2925	2951
Efs142	145	2972566	37.5842	5	150559	99.6	98.2	100	0.7	Good	2978	56	6				660	2318	688	560	459	835	2886	2934
Efs144	45	2949044	37.3385	3	306575	99.7	98.5	100		Good	2843	55	6	17	15	2	567	2276	679	555	456	826	2782	2812
Efs145	86	3133002	37.1879	6	165585	99.9	99	100	0.4	Good	3135	59	6				735	2400	707	579	467	852	3054	3086
Efs149	76	3109131	37.1336	5	179425	99.8	98.8	100		Good	3132	56	6				735	2397	708	580	474	852	3041	3078
Efs154	59	2999525	37.3088	4	284311	99.9	98.9	100	0.4	Good	2966	55	6				622	2344	710	584	478	855	2900	2924
Efs163	51	2927831	37.3383	3	271219	99.9	99	100		Good	2835	56	6	20	18	2	551	2284	696	573	463	841	2777	2806
Efs165	94	3095345	37.2779	5	222313	99.8	98.9	100	0.4	Good	3097	57	6	4	3	1	703	2394	712	584	478	856	3023	3050
Efs166	113	3251590	37.2109	7	138069	99.9	99.1	100		Good	3330	58	6				848	2482	726	592	476	871	3246	3275
Efs171	61	2960114	37.3861	4	293245	99.8	98.7	100	1.1	Good	2950	56	7				644	2306	701	573	467	847	2875	2907
Efs173	43	2895212	37.257	3	356129	99.5	98.5	100	0.2	Good	2779	52	6				597	2182	671	548	451	802	2672	2704
Efs175	47	2934058	37.3367	4	302331	99.9	99	100	0.1	Good	2834	56	6	20	18	2	564	2270	693	569	460	839	2775	2802
Efs178	71	2998580	37.2733	3	372989	99.9	98.8	100	0.1	Good	2932	56	6	17	15	2	645	2287	688	566	459	847	2866	2888
Efs180	58	2995224	37.3352	3	309231	99.8	98.7	100	0.1	Good	2961	54	6	4	3	1	627	2334	704	577	477	851	2887	2913
Efs183	43	2863521	37.416	4	265955	99.6	98.2	100	0.1	Good	2773	54	6				518	2255	688	561	466	818	2725	2748
Efs185	52	2916578	37.3618	3	386276	99.9	99	100		Good	2818	55	6	20	18	2	564	2254	689	568	460	842	2760	2788
Efs187	44	2961907	37.3375	3	334516	99.8	98.7	100	0.5	Good	2904	53	6				599	2305	702	573	473	846	2845	2872
Efs189	64	3003443	37.2888	4	176486	99.9	99	100		Good	2968	54	6	4	3	1	625	2343	705	578	473	852	2904	2927
Efs196	37	2889717	37.4538	3	312314	100	99.6	100		Good	2772	55	6				521	2251	688	563	460	833	2734	2747
Efs197	110	3190864	37.3035	7	160719	99.9	99.1	100	0.1	Good	3241	55	6				797	2444	716	585	475	873	3146	3185
Efs208	83	2817245	37.6045	7	143784	99.6	98.7	100	0.2	Good	2792	57	6	7	6	1	579	2213	686	563	461	838	2706	2750
Efs210	71	3010513	37.2258	4	198597	99.9	99	100	0.4	Good	2944	57	6	20	18	2	635	2309	698	575	464	844	2876	2907
Efs212	81	3205603	37.2055	8	146371	99.9	99.1	100	0.1	Good	3246	56	6				792	2454	725	595	478	865	3152	3193
Efs215	52	2914976	37.4729	2	328814	99.8	98.6	100		Good	2814	54	6	23	21	2	596	2218	682	559	456	826	2737	2781
Efs216	50	2800815	37.5966	2	507519	99.6	99	100	0.2	Good	2660	53	6				517	2143	682	555	458	809	2578	2616
Symbioflor 1	1	2810675	37.7161	1	2810675	99.7	98.8	100		Good	2732	63	12	9	8	1	503	2229	666	545	455	808	2679	2710
V583	232	3258787	37.4207	22	40862	100	99.7			Good	3375	55	3				864	2511	0	579	0	0	3305	3335
PFA	Proteins with Functional Assignments
PECNA	Proteins with EC Number Assignments
PGOA	Proteins with GO Assignments
PPA	Proteins with Pathway Assignments
PSA	Proteins with Subsystem Assignments
