# Supplementary material for: Genomic evaluation of the probiotic and pathogenic features of Enterococcus faecalis from human breast milk and comparison with the isolates from animal milk and clinical specimens
Source: PeerJ. 2024 Oct 29;12:e18392. doi: 10.7717/peerj.18392 (PMC11529597; doi:10.7717/peerj.18392)
Supplement: Table S4 [file peerj-12-18392-s004.xlsx]

## Sheet: Table S4
Table S4. Secondary metabolites detected in the analyzed Enterococcus faecalis genomes in this study.
Strains ID	Type	Most similar known cluster	Similarity	Class
Efa_HMD9_11M	RiPP-like
	lanthipeptide-class-ii	cytolysin ClyLl/cytolysin ClyLs	1	RiPP:Lanthipeptide
Efa_HMD11_46M	lanthipeptide-class-ii	cytolysin ClyLl/cytolysin ClyLs	1	RiPP:Lanthipeptide
	RiPP-like	carnobacteriocin XY	0.22	RiPP
Efa_HMD12_49M	RiPP-like	carnobacteriocin XY	0.22	RiPP
	lanthipeptide-class-ii	cytolysin ClyLl/cytolysin ClyLs	1	RiPP:Lanthipeptide
APC 3825	lanthipeptide-class-ii	cytolysin ClyLl/cytolysin ClyLs	1	RiPP:Lanthipeptide
	RiPP-like	carnobacteriocin XY	0.22	RiPP
CAUM157	cyclic-lactone-autoinducer
BR-MHR268	cyclic-lactone-autoinducer
FC	RiPP-like
	lanthipeptide-class-ii	cytolysin ClyLl/cytolysin ClyLs	1	RiPP:Lanthipeptide
	RiPP-like
	cyclic-lactone-autoinducer
	RiPP-like
	lanthipeptide-class-ii	cytolysin ClyLl/cytolysin ClyLs	1	RiPP:Lanthipeptide
QH5_5	RiPP-like
W35	lassopeptide	cochonodin I	0.3	RiPP
	RiPP-like
DRD-78	lassopeptide	cochonodin I	0.3	RiPP
Efs7	cyclic-lactone-autoinducer
	RiPP-like	TP-1161	0.08	RiPP:Thiopeptide
Efs16	lassopeptide	lactocin S	0.1	RiPP:Lanthipeptide
Efs24	cyclic-lactone-autoinducer
	RiPP-like
	RaS-RiPP
	RiPP-like
Efs30	NRPS	equibactin	0.35	NRP
	NRPS
Efs44	lassopeptide	cochonodin I	0.3	RiPP
	cyclic-lactone-autoinducer
	lanthipeptide-class-ii	cytolysin ClyLl/cytolysin ClyLs	0.8	RiPP:Lanthipeptide
Efs62	lanthipeptide-class-ii	cytolysin ClyLl/cytolysin ClyLs	1	RiPP:Lanthipeptide
Efs76	RiPP-like
	lanthipeptide-class-ii	cytolysin ClyLl/cytolysin ClyLs	0.8	RiPP:Lanthipeptide
Efs107	lanthipeptide-class-ii	cytolysin ClyLl/cytolysin ClyLs	0.8	RiPP:Lanthipeptide
Efs110	lassopeptide	cochonodin I	0.3	RiPP
	cyclic-lactone-autoinducer
	lanthipeptide-class-ii	cytolysin ClyLl/cytolysin ClyLs	1	RiPP:Lanthipeptide
Efs122	lanthipeptide-class-ii	cytolysin ClyLl/cytolysin ClyLs	1	RiPP:Lanthipeptide
Efs128	lassopeptide	cochonodin I	0.3	RiPP
	cyclic-lactone-autoinducer
	lanthipeptide-class-ii	cytolysin ClyLl/cytolysin ClyLs	0.8	RiPP:Lanthipeptide
Efs133	cyclic-lactone-autoinducer
Efs136	lanthipeptide-class-ii	cytolysin ClyLl/cytolysin ClyLs	1	RiPP:Lanthipeptide
Efs142	lanthipeptide-class-ii	cytolysin ClyLl/cytolysin ClyLs	0.8	RiPP:Lanthipeptide
Efs144	cyclic-lactone-autoinducer
	RiPP-like
Efs145	lanthipeptide-class-ii	cytolysin ClyLl/cytolysin ClyLs	1	RiPP:Lanthipeptide
	RiPP-like
Efs149	lanthipeptide-class-ii	cytolysin ClyLl/cytolysin ClyLs	1	RiPP:Lanthipeptide
Efs153	RiPP-like
	RRE-containing
	cyclic-lactone-autoinducer
Efs154	lanthipeptide-class-ii	cytolysin ClyLl/cytolysin ClyLs	1	RiPP:Lanthipeptide
Efs163	lassopeptide	cochonodin I	0.3	RiPP
	cyclic-lactone-autoinducer
	lanthipeptide-class-ii	cytolysin ClyLl/cytolysin ClyLs	0.8	RiPP:Lanthipeptide
Efs165	lanthipeptide-class-ii	cytolysin ClyLl/cytolysin ClyLs	1	RiPP:Lanthipeptide
Efs166	RiPP-like
	RRE-containing
	cyclic-lactone-autoinducer
	lanthipeptide-class-ii	cytolysin ClyLl/cytolysin ClyLs	0.8	RiPP:Lanthipeptide
Efs171	lanthipeptide-class-ii	cytolysin ClyLl/cytolysin ClyLs	1	RiPP:Lanthipeptide
Efs173	cyclic-lactone-autoinducer
	lanthipeptide-class-iii	micrococcin P1	0.08	RiPP:Thiopeptide
	RRE-containing
Efs175	lassopeptide	cochonodin I	0.3	RiPP
	cyclic-lactone-autoinducer
	lanthipeptide-class-ii	cytolysin ClyLl/cytolysin ClyLs	1	RiPP:Lanthipeptide
Efs178	lassopeptide	cochonodin I	0.3	RiPP
	RiPP-like
	lanthipeptide-class-ii	cytolysin ClyLl/cytolysin ClyLs	0.8	RiPP:Lanthipeptide
Efs180	lanthipeptide-class-ii	cytolysin ClyLl/cytolysin ClyLs	1	RiPP:Lanthipeptide
Efs183	cyclic-lactone-autoinducer
	RiPP-like
	lanthipeptide-class-ii	cytolysin ClyLl/cytolysin ClyLs	0.8	RiPP:Lanthipeptide
Efs185	lassopeptide	cochonodin I	0.3	RiPP
	lanthipeptide-class-ii	cytolysin ClyLl/cytolysin ClyLs	0.8	RiPP:Lanthipeptide
Efs187	lanthipeptide-class-ii	cytolysin ClyLl/cytolysin ClyLs	1	RiPP:Lanthipeptide
Efs189	lanthipeptide-class-ii	cytolysin ClyLl/cytolysin ClyLs	0.8	RiPP:Lanthipeptide
Efs196	cyclic-lactone-autoinducer
	RRE-containing
	lanthipeptide-class-ii	cytolysin ClyLl/cytolysin ClyLs	1	RiPP:Lanthipeptide
Efs197	RiPP-like
	RRE-containing
	cyclic-lactone-autoinducer
Efs210	lassopeptide	cochonodin I	0.3	RiPP
	cyclic-lactone-autoinducer
	lanthipeptide-class-ii	cytolysin ClyLl/cytolysin ClyLs	1	RiPP:Lanthipeptide
Efs212	RRE-containing
	RiPP-like
	cyclic-lactone-autoinducer
Efs215	cyclic-lactone-autoinducer
	lassopeptide	cochonodin I	0.3	RiPP
	LAP,thiopeptide
Efs216	cyclic-lactone-autoinducer
	lanthipeptide-class-ii	enterocin W α/enterocin W β	1	RiPP:Lanthipeptide
V583	lanthipeptide-class-ii	cytolysin ClyLl/cytolysin ClyLs	0.8	RiPP:Lanthipeptide
	RRE-containing
	RiPP-like
	cyclic-lactone-autoinducer
Note:The strains from analyzed genomes mentioned in Table S1 that not are present in this table mean no secondary metabolites were detected using antiSMASH tool in those genomes.
