# Supplementary material for: Genomic evaluation of the probiotic and pathogenic features of Enterococcus faecalis from human breast milk and comparison with the isolates from animal milk and clinical specimens
Source: PeerJ. 2024 Oct 29;12:e18392. doi: 10.7717/peerj.18392 (PMC11529597; doi:10.7717/peerj.18392)
Supplement: Table S6 [file peerj-12-18392-s006.xlsx]

## Sheet: Table S6
Table S6. Distribution of common and unique carbohydrate-active enzymes (CAZy) families among Enterococcus faecalis isolates.
Strains ID	CAZy families
[Efa_HMD9_11M] and [Efa_HMD11_46M] and [Efa_HMD12_49M] and [V583]	CE4, GH136, GH154, GH31, GH88, GT26, PL12_1
[Efa_HMD9_11M] and [Efa_HMD11_46M] and [Efa_HMD12_49M]	GH24
[Symbioflor 1] and [Efa_HMD9_11M] and [Efa_HMD11_46M] and [Efa_HMD12_49M] and [V583]	AA10, CBM50, CE1, CE7, CE9, GH1, GH101, GH105, GH109, GH125, GH126, GH13_20, GH13_31, GH170, GH18, GH2, GH20, GH25, GH3, GH32, GH35, GH38, GH4, GH63, GH65, GH73, GH92, GH94, GT2_Glyco_tranf_2_3, GT2_Glycos_transf_2, GT28, GT4, GT51, GT8, PL8
[Symbioflor 1]	AA1
