# Supplementary material for: Genomic evaluation of the probiotic and pathogenic features of Enterococcus faecalis from human breast milk and comparison with the isolates from animal milk and clinical specimens
Source: PeerJ. 2024 Oct 29;12:e18392. doi: 10.7717/peerj.18392 (PMC11529597; doi:10.7717/peerj.18392)
Supplement: Table S7 [file peerj-12-18392-s007.xlsx]

## Sheet: Table S7
Table S7. Mobile genetic elements identified in the analyzed Enterococcus faecalis genomes.
MGE	Type	Symbioflor 1	V583	Efa_HMD9_11M	Efa_HMD11_46M	Efa_HMD12_49M
cn_10142_IS1062	Composite transposon	+
cn_10264_IS1062	Composite transposon	+
cn_11752_ISLgar5	Composite transposon			+	+	+
cn_12489_ISLgar5	Composite transposon		+
cn_20572_ISEf1	Composite transposon		+
cn_22384_IS1062	Composite transposon	+
cn_4551_IS256	Composite transposon		+
IS1062	Insertion sequence	+
IS256	Insertion sequence		+
ISEf1	Insertion sequence		+
ISEfm1	Insertion sequence	+
ISEnfa4	Insertion sequence	+
ISLgar5	Insertion sequence		+	+	+	+
ISLla3	Insertion sequence	+
ISSsu5	Insertion sequence			+	+	+
Tn6009	Integrative Conjugative Element			+	+	+
